# Supplementary material
Source: PubMed Central journal article supplement (PMC7035615)
Supplement: pnas.1915798117.sapp.pdf [file pnas.1915798117.sapp.pdf]

# PNAS

[www.pnas.org](http://www.pnas.org)

Supplementary Information for

**Unique subsite specificity and potential natural function of a chitosan deacetylase from the human pathogen *Cryptococcus neoformans***

**Lea Hembach <sup>a</sup>, Martin Bonin <sup>a</sup>, Christian Gorzelanny <sup>b</sup>, Bruno M. Moerschbacher <sup>a,1</sup>**

Bruno M. Moerschbacher  
Email: [moersch@uni-muenster.de](mailto:moersch@uni-muenster.de)

**This PDF file includes:**

Figures S1 to S6  
Table S1

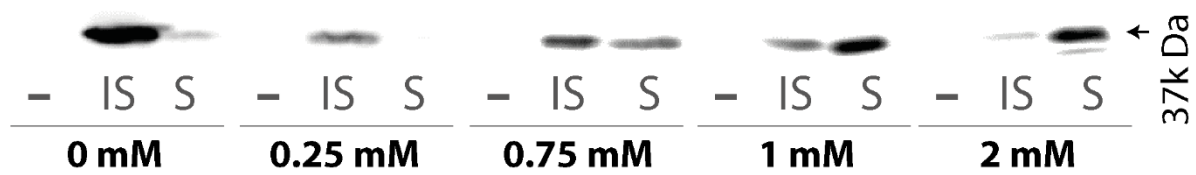

**Fig. S1.** Comparison of separated cell fractions of CnCda4 expressed in *E. coli* Lemo21 cells in the presence of  $\alpha$ -L-rhamnose (0–2 mM) by immunoblotting using an HRP coupled Strep-tag II affinity protein. (-) Before induction of expression with 400  $\mu$ M IPTG, (IS) insoluble fraction, (S) soluble fraction.

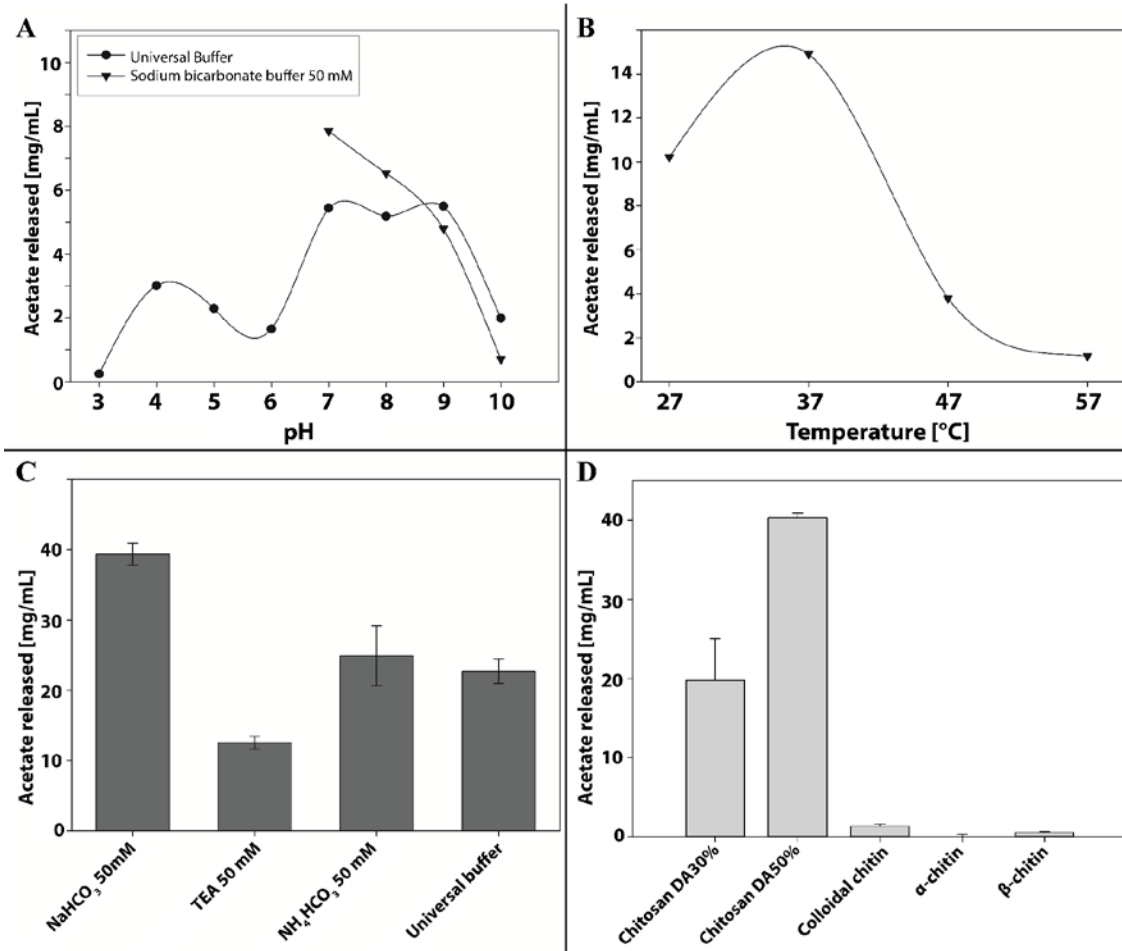

**Fig. S2.** CnCda4 in terms of pH, temperature, reaction buffer, and substrate. Enzyme activity was calculated from the quantity of acetate released during the reaction and each experiment was carried out at least in duplicate. (A) The pH and (B) temperature optima were determined by incubating 0.5  $\mu$ g CnCda4 for (A) 20 h or (B) 22 h at 37 °C with chitosan DA50%. (A) Sodium bicarbonate buffer (50 mM) ranging from pH 7 to 10 and a universal buffer consisting of 20 mM CH<sub>5</sub>NO<sub>2</sub>, 10 mM TEA, 10 mM KH<sub>2</sub>PO<sub>4</sub>, and 10 mM Na<sub>2</sub>HPO<sub>4</sub>, (pH 3–10). (B) 50 mM NaHCO<sub>3</sub>, pH 7. (C) We incubated 1  $\mu$ g CnCda4 for 24 h with chitosan DA50% at 37 °C in 50 mM NaHCO<sub>3</sub>, 50 mM pH7, TEA (50 mM), NH<sub>4</sub>HCO<sub>3</sub> (50 mM), and universal buffer. (D) We incubated 20  $\mu$ L of CnCda4 with chitosan DA50%, colloidal chitin,  $\alpha$ -chitin and  $\beta$ -chitin for 24 h at 37 °C in 50 mM NaHCO<sub>3</sub> (pH7). For C and D, n = 3, mean  $\pm$  SD.

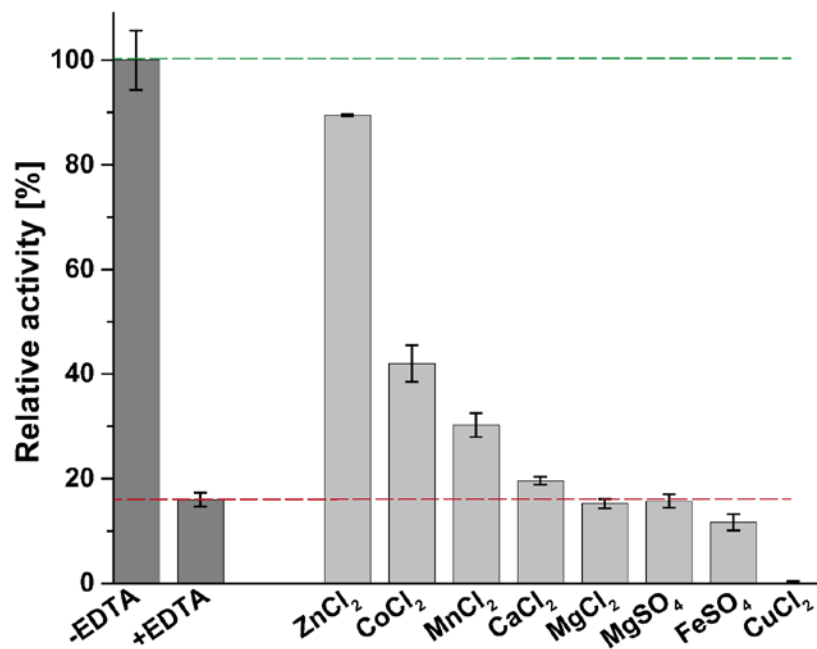

**Fig. S3.** Relative CnCda4 activity incubated without (–) EDTA and with (+) EDTA, before dialysis against NaHCO<sub>3</sub> to remove all EDTA and subsequent incubation with 1 mM metal salts for 2 h prior to activity tests on A4. The activity was measured by integrating LC-MS peak areas (n = 3, mean ± SD).

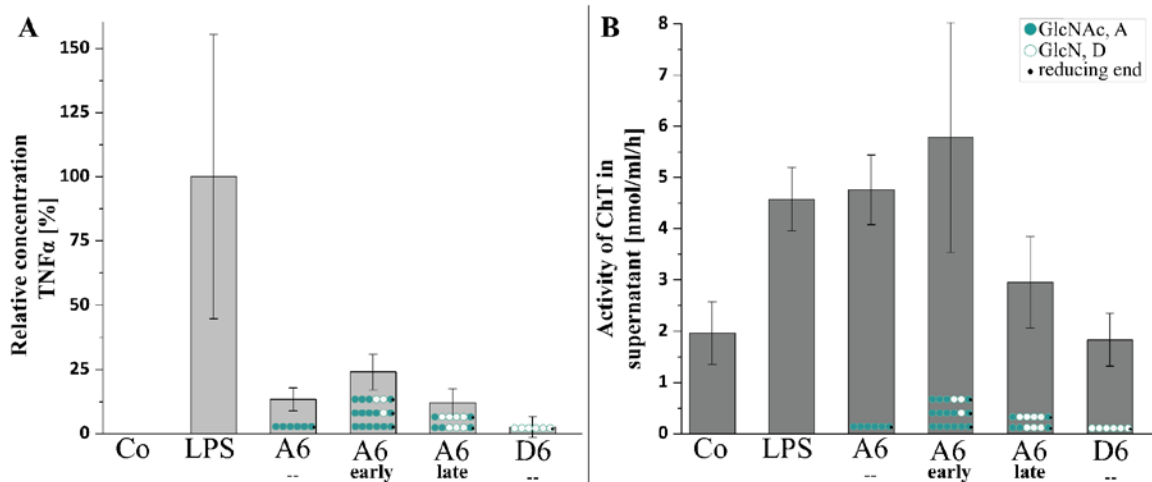

**Fig. S4.** The effect of early and late CnCda4 products, A6/D6 controls, culture medium as negative control, and LPS as positive control on the secretion of TNF $\alpha$  and the activity of the human chitotriosidase (ChT) in the cell supernatant of human peripheral blood-derived macrophages (HPBMs). (A) Activation of HPBMs by different chitin and chitosan hexamers (1  $\mu$ g/mL). Secretion of TNF $\alpha$  into the supernatant was measured 6 h after stimulation. Data from five independent experiments with different batches of macrophages were normalized to the negative control (starvation medium, 0%) and to the positive control (10 ng/mL LPS, 100%). Data are presented as means  $\pm$  SD. (B) Activity of the human ChT measured in the supernatant after stimulation with the different chitin and chitosan hexamers (1  $\mu$ g/mL). The concentration of ChT in 5  $\mu$ L supernatant was determined by adding 20 mM of the ChT substrate 4-methylumbelliferyl- $\beta$ -D-*N,N'*-diacetylchitobioside in 100 mL McIlvain buffer (100 mM citric acid, 200 mM sodium phosphate, pH 5.2). The enzyme reaction was stopped after 20 min at 37  $^{\circ}$ C by adding 200 mL 300 mM glycine-NaOH buffer, pH 10.5. Converted substrate was measured by fluorimetry at 450 nm and related to a standard of recombinant ChT. Values are means of three independent experiments  $\pm$  SD.

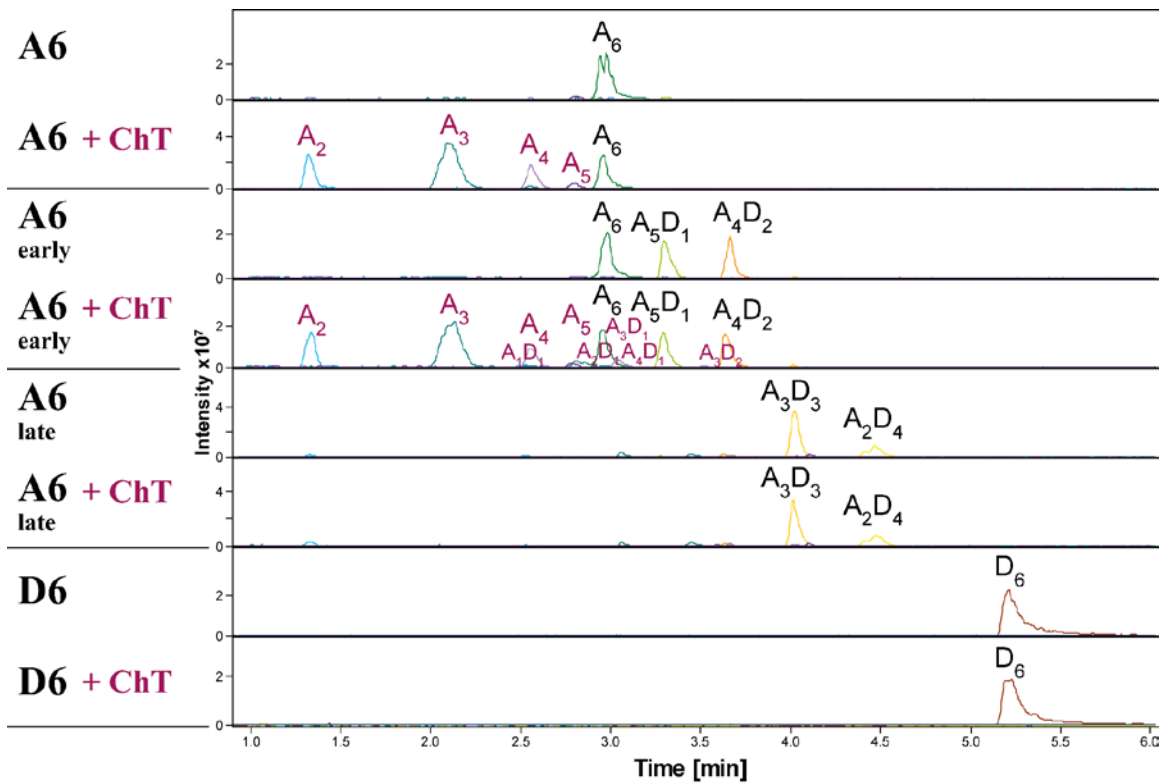

**Fig. S5.** Product profile following the digestion of hexameric CnCda4 products (used for stimulation of human macrophages) with human chitotriosidase (ChT). We incubated 5  $\mu$ g of the hexameric samples with 50 ng of purified ChT for 24 h at 37  $^{\circ}$ C in 50 mM ammonium acetate buffer pH (4.5). The products were quantified by HPLC-MS analysis.

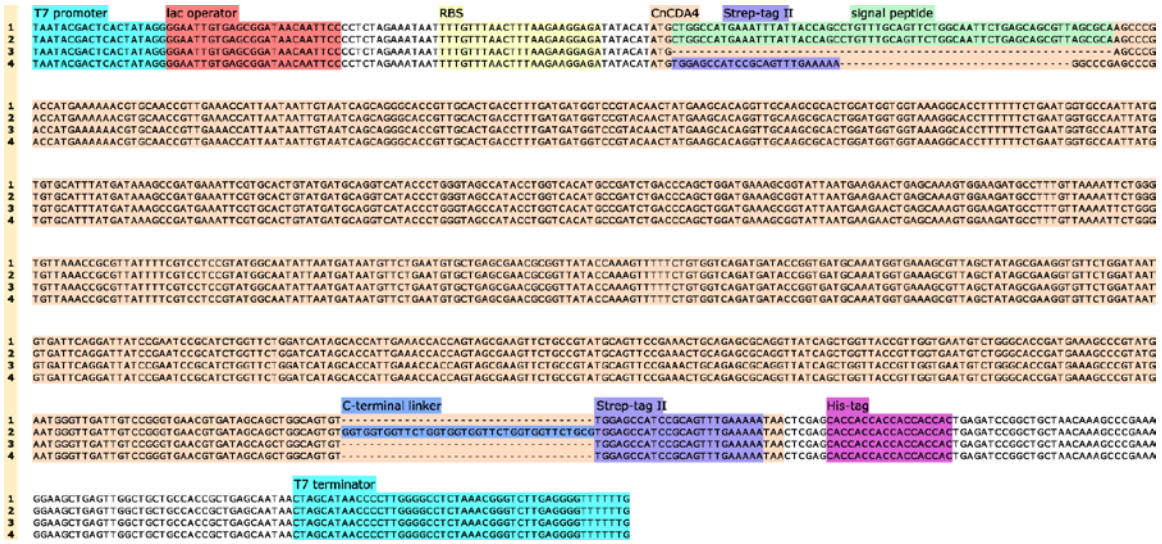

**Fig. S6.** Sequence alignment of the different CnCda4 constructs used during this work. (1) pET22b(+)::SP-*CDA4*-StrepII, (2) pET22b(+)::SP-*CDA4*-linker-StrepII, (3) pET22b(+)::*CDA4*-strepII, and (4) pET22b(+)::StrepII-*CDA4*-StrepII. All constructs have a pET22b(+) backbone differing only in their sequences shown in this alignment, which contains the following elements: T7 promoter, *lac* operator, ribosome binding site (RBS), CnCda4 sequences including either an N-terminal Strep-tag II or the original signal peptide (SP), a C-terminal linker and a C-terminal Strep-tag II, an unused His<sub>6</sub> tag originating from the pET22b(+) plasmid and the T7 terminator.

**Table S1.** Mono-isotopic  $m/z$  values of chitin and chitosan oligomers used for analysis, isolation and fragmentation (MS/MS) with A representing an *N*-acetyl-D-glucosamine unit, D a D-glucosamine unit, R a D-glucosamine unit chemically acetylated using [ $^2\text{H}_6$ ]acetic anhydride (Sigma-Aldrich) and  $^{18}\text{O}$  representing the reducing end labeled with  $\text{H}_2^{18}\text{O}$ .

| <b>AD</b>   | <b>H+</b><br>Charge1 | <b>H+</b><br>Charge2 | <b>AD <math>^{18}\text{O}</math></b> | <b>H+</b><br>Charge1 | <b>H+</b><br>Charge2 | <b>AR</b>   | <b>H+</b><br>Charge1 | <b>H+</b><br>Charge2 | <b>AR <math>^{18}\text{O}</math></b> | <b>H+</b><br>Charge1 | <b>H+</b><br>Charge2 |
|-------------|----------------------|----------------------|--------------------------------------|----------------------|----------------------|-------------|----------------------|----------------------|--------------------------------------|----------------------|----------------------|
| <b>A1</b>   | 222.097              |                      | <b>A1</b>                            | 224.097              |                      | <b>A1</b>   | 222.097              |                      | <b>A1</b>                            | 224.101              |                      |
| <b>D1</b>   | 180.087              |                      | <b>R1</b>                            | 182.087              |                      | <b>R1</b>   | 225.116              |                      | <b>R1</b>                            | 227.120              |                      |
| <b>A2</b>   | 425.177              | 213.092              | <b>A2</b>                            | 427.177              | 214.092              | <b>A2</b>   | 425.177              | 213.092              | <b>A2</b>                            | 427.181              | 214.094              |
| <b>A1D1</b> | 383.166              | 192.087              | <b>A1R1</b>                          | 385.166              | 193.087              | <b>A1R1</b> | 428.195              | 214.601              | <b>A1R1</b>                          | 430.200              | 215.603              |
| <b>D2</b>   | 341.155              | 171.081              | <b>R2</b>                            | 343.155              | 172.081              | <b>R2</b>   | 431.214              | 216.111              | <b>R2</b>                            | 433.218              | 217.113              |
| <b>A3</b>   | 628.256              | 314.632              | <b>A3</b>                            | 630.256              | 315.632              | <b>A3</b>   | 628.256              | 314.632              | <b>A3</b>                            | 630.260              | 315.634              |
| <b>A2D1</b> | 586.245              | 293.626              | <b>A2R1</b>                          | 588.245              | 294.626              | <b>A2R1</b> | 631.275              | 316.141              | <b>A2R1</b>                          | 633.279              | 317.143              |
| <b>A1D2</b> | 544.235              | 272.621              | <b>A1R2</b>                          | 546.235              | 273.621              | <b>A1R2</b> | 634.294              | 317.650              | <b>A1R2</b>                          | 636.298              | 318.653              |
| <b>D3</b>   | 502.224              | 251.616              | <b>R3</b>                            | 504.224              | 252.616              | <b>R3</b>   | 637.312              | 319.160              | <b>R3</b>                            | 639.317              | 320.162              |
| <b>A4</b>   | 831.335              | 416.171              | <b>A4</b>                            | 833.335              | 417.171              | <b>A4</b>   | 831.335              | 416.171              | <b>A4</b>                            | 833.340              | 417.173              |
| <b>A3D1</b> | 789.325              | 395.166              | <b>A3R1</b>                          | 791.325              | 396.166              | <b>A3R1</b> | 834.354              | 417.681              | <b>A3R1</b>                          | 836.358              | 418.683              |
| <b>A2D2</b> | 747.314              | 374.161              | <b>A2R2</b>                          | 749.314              | 375.161              | <b>A2R2</b> | 837.373              | 419.190              | <b>A2R2</b>                          | 839.377              | 420.192              |
| <b>A1D3</b> | 705.304              | 353.155              | <b>A1R3</b>                          | 707.304              | 354.155              | <b>A1R3</b> | 840.392              | 420.700              | <b>A1R3</b>                          | 842.396              | 421.702              |
| <b>D4</b>   | 663.293              | 332.150              | <b>R4</b>                            | 665.293              | 333.150              | <b>R4</b>   | 843.411              | 422.209              | <b>R4</b>                            | 845.415              | 423.211              |
| <b>A5</b>   | 1034.415             | 517.711              | <b>A5</b>                            | 1036.415             | 518.711              | <b>A5</b>   | 1034.415             | 517.711              | <b>A5</b>                            | 1036.419             | 518.713              |
| <b>A4D1</b> | 992.404              | 496.706              | <b>A4R1</b>                          | 994.404              | 497.706              | <b>A4R1</b> | 1037.434             | 519.220              | <b>A4R1</b>                          | 1039.438             | 520.223              |
| <b>A3D2</b> | 950.394              | 475.700              | <b>A3R2</b>                          | 952.394              | 476.700              | <b>A3R2</b> | 1040.452             | 520.730              | <b>A3R2</b>                          | 1042.457             | 521.732              |
| <b>A2D3</b> | 908.383              | 454.695              | <b>A2R3</b>                          | 910.383              | 455.695              | <b>A2R3</b> | 1043.471             | 522.239              | <b>A2R3</b>                          | 1045.475             | 523.241              |
| <b>A1D4</b> | 866.372              | 433.690              | <b>A1R4</b>                          | 868.372              | 434.690              | <b>A1R4</b> | 1046.490             | 523.749              | <b>A1R4</b>                          | 1048.494             | 524.751              |
| <b>D5</b>   | 824.362              | 412.685              | <b>R5</b>                            | 826.362              | 413.685              | <b>R5</b>   | 1049.509             | 525.258              | <b>R5</b>                            | 1051.513             | 526.260              |
| <b>A6</b>   | 1237.494             | 619.251              | <b>A6</b>                            | 1239.494             | 620.251              | <b>A6</b>   | 1237.494             | 619.251              | <b>A6</b>                            | 1239.498             | 620.253              |
| <b>A5D1</b> | 1195.484             | 598.245              | <b>A5R1</b>                          | 1197.484             | 599.245              | <b>A5R1</b> | 1240.513             | 620.760              | <b>A5R1</b>                          | 1242.517             | 621.762              |
| <b>A4D2</b> | 1153.473             | 577.240              | <b>A4R2</b>                          | 1155.473             | 578.240              | <b>A4R2</b> | 1243.532             | 622.270              | <b>A4R2</b>                          | 1245.536             | 623.272              |
| <b>A3D3</b> | 1111.462             | 556.235              | <b>A3R3</b>                          | 1113.462             | 557.235              | <b>A3R3</b> | 1246.551             | 623.779              | <b>A3R3</b>                          | 1248.555             | 624.781              |
| <b>A2D4</b> | 1069.452             | 535.230              | <b>A2R4</b>                          | 1071.452             | 536.230              | <b>A2R4</b> | 1249.569             | 625.288              | <b>A2R4</b>                          | 1251.574             | 626.290              |
| <b>A1D5</b> | 1027.441             | 514.224              | <b>A1R5</b>                          | 1029.441             | 515.224              | <b>A1R5</b> | 1252.588             | 626.798              | <b>A1R5</b>                          | 1254.592             | 627.800              |
| <b>D6</b>   | 985.431              | 493.219              | <b>R6</b>                            | 987.431              | 494.219              | <b>R6</b>   | 1255.607             | 628.307              | <b>R6</b>                            | 1257.611             | 629.309              |
